# Supplementary material for: Endothelial Mitochondria Transfer to Melanoma Induces M2-Type Macrophage Polarization and Promotes Tumor Growth by the Nrf2/HO-1-Mediated Pathway
Source: MDPI journal article supplement (doi:10.3390/ijms25031857), 2024-02-03
Supplement: s1 [file s1]

### Supplementary figure

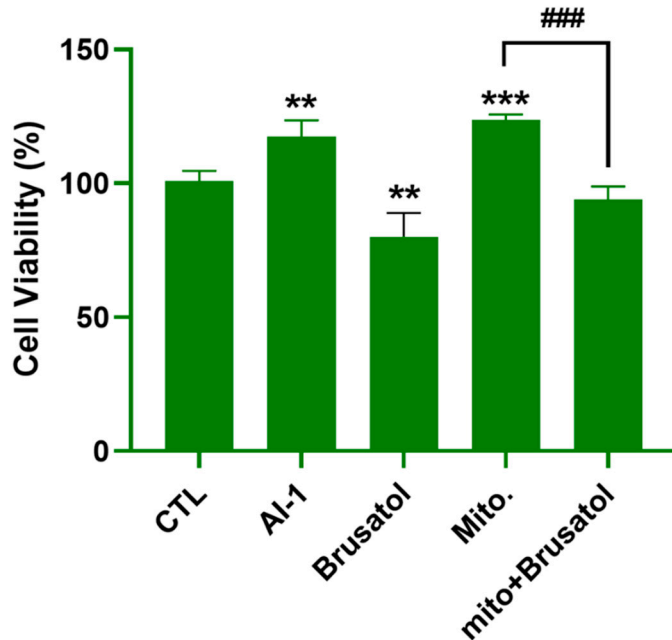

Figure S1. Viability of B16F10 cells at 48 h after treatment (AI-1: Nrf2 activator; brusatol: Nrf2 inhibitor; Mito: endothelial mitochondria), as evaluated using the CCK8 assay. The AI-1 (10  $\mu$ M; Nrf2 activator) or brusatol (40 nM; Nrf2 inhibitor) was used to evaluate cell viability at 48 h by CCK-8. The results demonstrated that Nrf2 activator increased cell viability, however, Nrf2 inhibitor suppressed cell growth. Nrf2 inhibitor, brusatol, significantly reversed endothelial mitochondria-induced cell growth, suggesting that Nrf2 was involved in endothelial mitochondria transfer-mediated melanoma growth. Statistical analysis was used to determine if treatments were not significant, or significant compared to control (CTL) at  $P < 0.01$  (\*\*) or  $P < 0.005$  (\*\*\*) or significant compared to Mito group at  $P < 0.005$  (###). Analysis was performed on five independent experiments and the mean values ( $\pm$ SEM) shown.
